# Supplementary material
Source: MDPI journal article supplement (https://www.mdpi.com/2073-4441/14/15/2442)
Supplement: s1 [file s1]

Table S2. Methods of analysis, detection limits, analytical results and recovery of certified reference material “Trapp ST-2a (Russian standard GSO 8671-2005).

| Element | Method  | Detection limit | Certified value | Found | Recovery.% |
|---------|---------|-----------------|-----------------|-------|------------|
| Na      | AES     | 0.005           | 2.32            | 2.5   | 93         |
| Mg      | AES     | 0.008           | 7.51            | 7.5   | 100        |
| Al      | AES     | 0.007           | 14.63           | 14.8  | 99         |
| P       | AES     | 0.005           | 0.17            | 0.17  | 100        |
| S       | AES     | 0.002           | 0.026           | 0.029 | 90         |
| K       | AES     | 0.001           | 0.46            | 0.47  | 98         |
| Ca      | AES     | 0.007           | 10.42           | 10.5  | 99         |
| Ti      | AES, MS | 0.0007          | 1.59            | 1.6   | 99         |
| Mn      | AES, MS | 0.0001          | 0.21            | 0.23  | 91         |
| Fe      | AES     | 0.006           | 14.62           | 14.6  | 100        |
| Li      | MS      | 0.03            | 9               | 10.4  | 87         |
| Be      | MS      | 0.01            | 0.8             | 0.72  | 111        |
| Sc      | MS      | 0.1             | 41              | 39.8  | 103        |
| V       | AES, MS | 0.8             | 315             | 320   | 98         |
| Cr      | AES, MS | 0.7             | 213             | 230   | 93         |
| Co      | MS      | 0.2             | 52              | 54.6  | 95         |
| Ni      | AES, MS | 0.7             | 126             | 123   | 102        |
| Cu      | AES, MS | 0.6             | 180             | 188   | 96         |
| Zn      | AES, MS | 0.9             | 112             | 111   | 101        |
| Ga      | MS      | 0.04            | 17              | 20.1  | 85         |
| As      | MS      | 0.08            | -               | < DL  | -          |
| Se      | MS      | 0.8             | -               | < DL  | -          |
| Rb      | MS      | 0.06            | 11              | 11.1  | 99         |
| Sr      | AES, MS | 0.06            | 197             | 200   | 99         |
| Y       | MS      | 0.08            | 29              | 30.0  | 97         |
| Zr      | MS      | 0.07            | 125             | 108   | 116        |
| Nb      | MS      | 0.03            | 6.0             | 5.2   | 115        |
| Mo      | MS      | 0.06            | 1.0             | 0.67  | 149        |
| Rh      | MS      | 0.08            | -               | < DL  | -          |
| Pd      | MS      | 0.06            | -               | < DL  | -          |
| Ag      | MS      | 0.03            | 0.05            | 0.065 | 77         |
| Cd      | MS      | 0.04            | -               | 0.1   | -          |
| Sn      | MS      | 0.08            | 2.6             | 1.04  | 250        |
| Sb      | MS      | 0.03            | -               | 0.149 | -          |
| Te      | MS      | 0.07            | -               | < DL  | -          |
| Cs      | MS      | 0.01            | 0.5             | 0.35  | 143        |
| Ba      | AES, MS | 0.07            | 227             | 153   | 148        |
| La      | MS      | 0.02            | 8               | 8.2   | 98         |
| Ce      | MS      | 0.03            | 22              | 19.8  | 111        |
| Pr      | MS      | 0.006           | 2.6             | 2.7   | 96         |
| Nd      | MS      | 0.008           | 13.2            | 13.1  | 101        |
| Sm      | MS      | 0.007           | 4.0             | 3.9   | 103        |

|    |    |       |        |       |     |
|----|----|-------|--------|-------|-----|
| Eu | MS | 0.007 | 1.4    | 1.3   | 108 |
| Gd | MS | 0.005 | 4.5    | 4.7   | 96  |
| Tb | MS | 0.006 | 0.8    | 0.8   | 100 |
| Dy | MS | 0.004 | 5.1    | 5.2   | 98  |
| Ho | MS | 0.006 | 1      | 1.1   | 91  |
| Er | MS | 0.007 | 2.9    | 3.2   | 91  |
| Tm | MS | 0.004 | 0.44   | 0.45  | 98  |
| Yb | MS | 0.004 | 3.3    | 3.1   | 106 |
| Lu | MS | 0.004 | 0.44   | 0.44  | 100 |
| Hf | MS | 0.02  | 2.7    | 2.9   | 93  |
| Ta | MS | 0.01  | 0.4    | 0.31  | 129 |
| W  | MS | 0.03  | 0.4    | 0.21  | 190 |
| Re | MS | 0.007 | -      | < DL  | -   |
| Ir | MS | 0.005 | -      | < DL  | -   |
| Pt | MS | 0.006 | -      | < DL  | -   |
| Au | MS | 0.03  | 0.0026 | < DL  | -   |
| Hg | MS | 0.01  | -      | 0.016 | -   |
| Tl | MS | 0.004 | -      | 0.051 | -   |
| Pb | MS | 0.053 | 3.0    | 2.4   | 124 |
| Bi | MS | 0.005 | -      | < DL  | -   |
| Th | MS | 0.009 | 1.0    | 1.1   | 111 |
| U  | MS | 0.004 | 0.5    | 0.47  | 106 |

<DL - under limit of detection; ND – not determined

Detection limits and certified value, for Na- Fe in %, for Li – U in  $\mu\text{g g}^{-1}$

The MS measurements (ICP-MS (X-7, Thermo Scientific, USA) were made using the standard parameters: a RF generator power of 1250 W; a PolyCon nebulizer; a plasma-forming Ar flow rate of 12 L/min; an auxiliary Ar flow rate of 0.9 L/min; an Ar flow rate into the nebulizer of 0.9 L/min; an analysed sample flow rate of 0.8 mL/ min

The AES measurements (iCAP-6500, Thermo Scientific, USA) were made using the standard parameters: a RF generator power of 1200 W; a PolyCon nebulizer; a plasma-forming Ar flow rate of 13 L/min; an auxiliary Ar flow rate of 0.8 L/min; an Ar flow rate into the nebulizer of 0.8 L/min; an analysed sample flow rate of 1.5 mL/ min
