# Supplementary material
Source: MDPI journal article supplement (https://www.mdpi.com/2073-4441/14/15/2442)
Supplement: s1 [file s1]

Table S1. Methods of analysis, detection limits, analytical results and recovery of certified reference material “Trace Metals in Drinking Water” (High-Purity Standards, USA).

| Element | Detection limit | Method  | Found  | Certified value. $\mu\text{g L}^{-1}$ | Recovery, % |
|---------|-----------------|---------|--------|---------------------------------------|-------------|
| Na      | 8               | AES     | 5975   | 6000                                  | 100.4       |
| Mg      | 9               | AES     | 8913   | 9000                                  | 101.0       |
| Al      | 1               | AES     | 122    | 120                                   | 98.4        |
| Si      | 26              | AES     | <DL    | -                                     | ND          |
| P       | 11              | AES     | <DL    | -                                     | ND          |
| S       | 14              | AES     | <DL    | -                                     | ND          |
| K       | 8               | AES     | 2474   | 2500                                  | 101.1       |
| Ca      | 8               | AES     | 34429  | 35000                                 | 101.7       |
| Sc      | 0.07            | MS      | <DL    | -                                     | ND          |
| Ti      | 0.6             | AES, MS | <DL    | -                                     | ND          |
| V       | 0.07            | AES, MS | 30.2   | 30                                    | 99.3        |
| Cr      | 0.5             | AES, MS | 20.6   | 20                                    | 97.1        |
| Mn      | 0.06            | AES, MS | 40.3   | 40                                    | 99.3        |
| Fe      | 5               | AES     | 100    | 100                                   | 100.0       |
| Co      | 0.07            | AES, MS | 25.7   | 25                                    | 97.3        |
| Ni      | 0.3             | AES, MS | 61.6   | 60                                    | 97.4        |
| Cu      | 0.3             | AES, MS | 21.3   | 20                                    | 93.9        |
| Zn      | 0.7             | AES, MS | 68.6   | 70                                    | 102.0       |
| Ga      | 0.04            | MS      | <DL    | -                                     | ND          |
| Ge      | 0.04            | MS      | <DL    | -                                     | ND          |
| As      | 0.05            | MS      | 80.6   | 80                                    | 99.3        |
| Se      | 0.3             | MS      | 10.5   | 10                                    | 95.2        |
| Br      | 7               | MS      | <DL    | -                                     | ND          |
| Sr      | 0.04            | AES, MS | 249    | 250                                   | 100.4       |
| Ba      | 0.03            | AES, MS | 51.8   | 50                                    | 96.5        |
| Hg      | 0.01            | MS      | <DL    | -                                     | ND          |
| Pb      | 0.02            | MS      | 40.3   | 40                                    | 99.3        |
| Li      | 6               | AES, MS | 20265  | 20000                                 | 98.7        |
| Be      | 6               | MS      | 20506  | 20000                                 | 97.5        |
| Rb      | 6               | MS      | 10359  | 10000                                 | 96.5        |
| Y       | 3               | MS      | <DL    | -                                     | ND          |
| Zr      | 6               | MS      | 1912   | -                                     | ND          |
| Nb      | 3               | MS      | 29.8   | -                                     | ND          |
| Mo      | 8               | MS      | 102394 | 100000                                | 97.7        |
| Ru      | 4               | MS      | <DL    | -                                     | ND          |
| Rh      | 5               | MS      | <DL    | -                                     | ND          |
| Pd      | 5               | MS      | <DL    | -                                     | ND          |
| Ag      | 3               | MS      | 2036   | 2000                                  | 98.2        |
| Cd      | 6               | MS      | 10374  | 10000                                 | 96.4        |
| In      | 3               | MS      | <DL    | -                                     | ND          |
| Sn      | 16              | MS      | 76.7   |                                       | ND          |
| Sb      | 5               | MS      | 10367  | 10000                                 | 96.5        |
| Te      | 6               | MS      | 3017   | 3000                                  | 99.4        |
| Cs      | 0.7             | MS      | 17.8   | -                                     | ND          |
| La      | 2               | MS      | 8.9    | -                                     | ND          |
| Ce      | 2.1             | MS      | 32.5   | -                                     | ND          |

|    |     |    |       |       |       |
|----|-----|----|-------|-------|-------|
| Pr | 0.6 | MS | <DL   | -     | ND    |
| Nd | 0.9 | MS | <DL   | -     | ND    |
| Sm | 0.6 | MS | <DL   | -     | ND    |
| Eu | 0.5 | MS | <DL   | -     | ND    |
| Gd | 0.6 | MS | 115   | -     | ND    |
| Tb | 0.5 | MS | <DL   | -     | ND    |
| Dy | 0.5 | MS | <DL   | -     | ND    |
| Ho | 0.5 | MS | <DL   | -     | ND    |
| Er | 0.5 | MS | <DL   | -     | ND    |
| Tm | 0.5 | MS | <DL   | -     | ND    |
| Yb | 0.5 | MS | <DL   | -     | ND    |
| Lu | 0.5 | MS | <DL   | -     | ND    |
| Hf | 2   | MS | 26.0  | -     | ND    |
| Ta | 1   | MS | 21.2  | -     | ND    |
| W  | 4   | MS | 34.8  | -     | ND    |
| Re | 0.8 | MS | <DL   | -     | ND    |
| Os | 0.6 | MS | <DL   | -     | ND    |
| Ir | 0.6 | MS | <DL   | -     | ND    |
| Pt | 0.6 | MS | <DL   | -     | ND    |
| Au | 2   | MS | <DL   | -     | ND    |
| Tl | 0.6 | MS | 10114 | 10000 | 98.9  |
| Bi | 1.9 | MS | 9907  | 10000 | 100.9 |
| Th | 0.8 | MS | 27.9  | -     | ND    |
| U  | 0.6 | MS | 10170 | 10000 | 98.3  |

<DL - under limit of detection; ND – not determined

Detection limits for Na- Pb in  $\mu\text{g L}^{-1}$ , for Li – U in  $\text{ng L}^{-1}$
